# Supplementary material
Source: PubMed Central journal article supplement (PMC2635789)
Supplement: 0811268106_0811268106SI.pdf [file 0811268106_0811268106SI.pdf]

# Supporting Information

Uniacke and Zerges 10.1073/pnas.0811268106

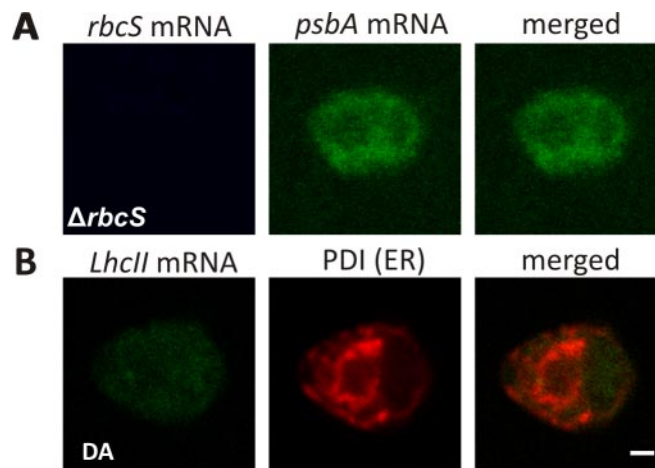

**Fig. S1.** Control experiments for the specificities of the *RbcS2* and *LhclI* mRNA FISH signals. (A) The *RbcS* FISH signal was specific because it was absent in a deletion mutant for both *RbcS* genes. (B) The *LhclI* FISH signal could be detected only at the background level (i.e., weak and equal in the cytosolic region and the chloroplast) in DA cells, serving as a control for its specificity. The micrographs show 0.2- $\mu\text{m}$  optical sections. PDI, protein disulfide isomerase. (Scale bar: 1  $\mu\text{m}$ .)
